# Supplementary material for: Fabrication of an ultra-stable composite electrode material of La2O3/Co3O4/graphene on nickel foam for high-performance supercapacitors
Source: Royal Society of Chemistry journal article supplement (doi:10.1039/d2nj00089j), 2022-01-01
Supplement: d2nj00089j1.pdf [file d2nj00089j1.pdf]

# Supporting Information

## **Fabrication of ultra-stable composite electrode material of La<sub>2</sub>O<sub>3</sub>/Co<sub>3</sub>O<sub>4</sub>/graphene on nickel foam for high-performance supercapacitors**

Zijing Wang,<sup>a</sup> Shixiang Lu,<sup>\*a</sup> Wenguo Xu,<sup>\*a</sup> Ziwen Wang,<sup>a</sup> and Hao Zuo,<sup>a</sup>

School of Chemistry and Chemical Engineering, Beijing Institute of Technology, Beijing  
100081, China.

---

*\*Corresponding author, E-mail: shixianglu@bit.edu.cn (Shixiang Lu); xuwg60@bit.edu.cn (Wenguo Xu)*

## Experimental

### S1: Preparation of CGN electrode material

0.6 mM (0.18 g) of  $\text{Co}(\text{NO}_3)_2 \cdot 6\text{H}_2\text{O}$ , and 3.6 mM (0.216 g) of  $\text{CH}_4\text{N}_2\text{O}$  were dissolved in 8 mL distilled water to obtain a homogeneous solution. The graphene solution (8 mL,  $1 \text{ mg mL}^{-1}$ ) and the above solution were mixed and stirred vigorously for 0.5 h. The resulting solution with the cleaned NF was transferred to a 25 mL autoclave, heated at  $120^\circ\text{C}$  for 14 h, and then naturally cooled down to room temperature. Subsequently, the Co precursor/GO@NF sample was first fabricated, washed with ethanol and distilled water several times, then dried at  $60^\circ\text{C}$  for 8 h. Later, CGN was obtained after the Co precursor/GO@NF was annealed for 2 h at  $300^\circ\text{C}$  in a Muffle furnace. The mass of active substances grown on the CGN electrode is  $\sim 1 \text{ mg cm}^{-2}$ .

### S2: Preparation of LGN electrode material

0.6 mM (0.195 g) of  $\text{LaN}_3\text{O}_9 \cdot x\text{H}_2\text{O}$  and 3.6 mM (0.216 g) of  $\text{CH}_4\text{N}_2\text{O}$  were dissolved in 8 mL distilled water to obtain a homogeneous solution. The graphene solution (8 mL,  $1 \text{ mg mL}^{-1}$ ) and the above solution were mixed and stirred vigorously for 0.5 h. The resulting solution with the cleaned NF was transferred to a 25 mL autoclave, heated at  $120^\circ\text{C}$  for 14 h, and then naturally cooled down to room temperature. Subsequently, the La precursor/GO@NF sample was first fabricated, washed with ethanol and distilled water several times, then dried at  $60^\circ\text{C}$  for 8 h. Later, LGN was obtained after the La precursor/GO@NF was annealed for 2 h at  $300^\circ\text{C}$  in a Muffle furnace. The mass of active substances grown on the LGN electrode is  $\sim 1 \text{ mg cm}^{-2}$ .

### S3: Preparation of LCN electrode material

0.6 mM (0.18 g) of  $\text{Co}(\text{NO}_3)_2 \cdot 6\text{H}_2\text{O}$ , and 0.6 mM (0.195 g) of  $\text{LaN}_3\text{O}_9 \cdot x\text{H}_2\text{O}$  were dissolved in 8 mL distilled water to obtain a homogeneous solution. The graphene solution (8 mL,  $1 \text{ mg mL}^{-1}$ ) and the above solution were mixed and stirred vigorously for 0.5 h. The resulting solution with the cleaned NF was transferred to a 25 mL autoclave, heated at  $120^\circ\text{C}$  for 14 h, and then naturally cooled down to room temperature. Subsequently, the sample of La-Co precursor @NF was first fabricated, and washed with ethanol and distilled water several times, then dried at  $60^\circ\text{C}$  for 8 h. Later, LCN was obtained after the La-Co precursor @NF was annealed for 2 h at  $300^\circ\text{C}$  in a Muffle furnace. The mass of active substances grown on the LCN electrode is  $\sim 1 \text{ mg cm}^{-2}$ .

### S4: Preparation of GN electrode material

The graphene solution ( $16 \text{ mL}$ ,  $2 \text{ mg mL}^{-1}$ ) was stirred vigorously for 0.5 h. Then the solution with the cleaned NF was transferred to a 25 mL autoclave, heated at  $120^\circ\text{C}$  for 14 h, and then naturally cooled down to room temperature. Subsequently, the sample of GO@NF was first fabricated, and washed with ethanol and distilled water several times, then dried at  $60^\circ\text{C}$  for 8 h. Later, GN was obtained after the GO@NF was annealed for 2 h at  $300^\circ\text{C}$  in a Muffle furnace. The mass of active substances grown on the GN electrode is  $\sim 1 \text{ mg cm}^{-2}$ .

## Results and discussion

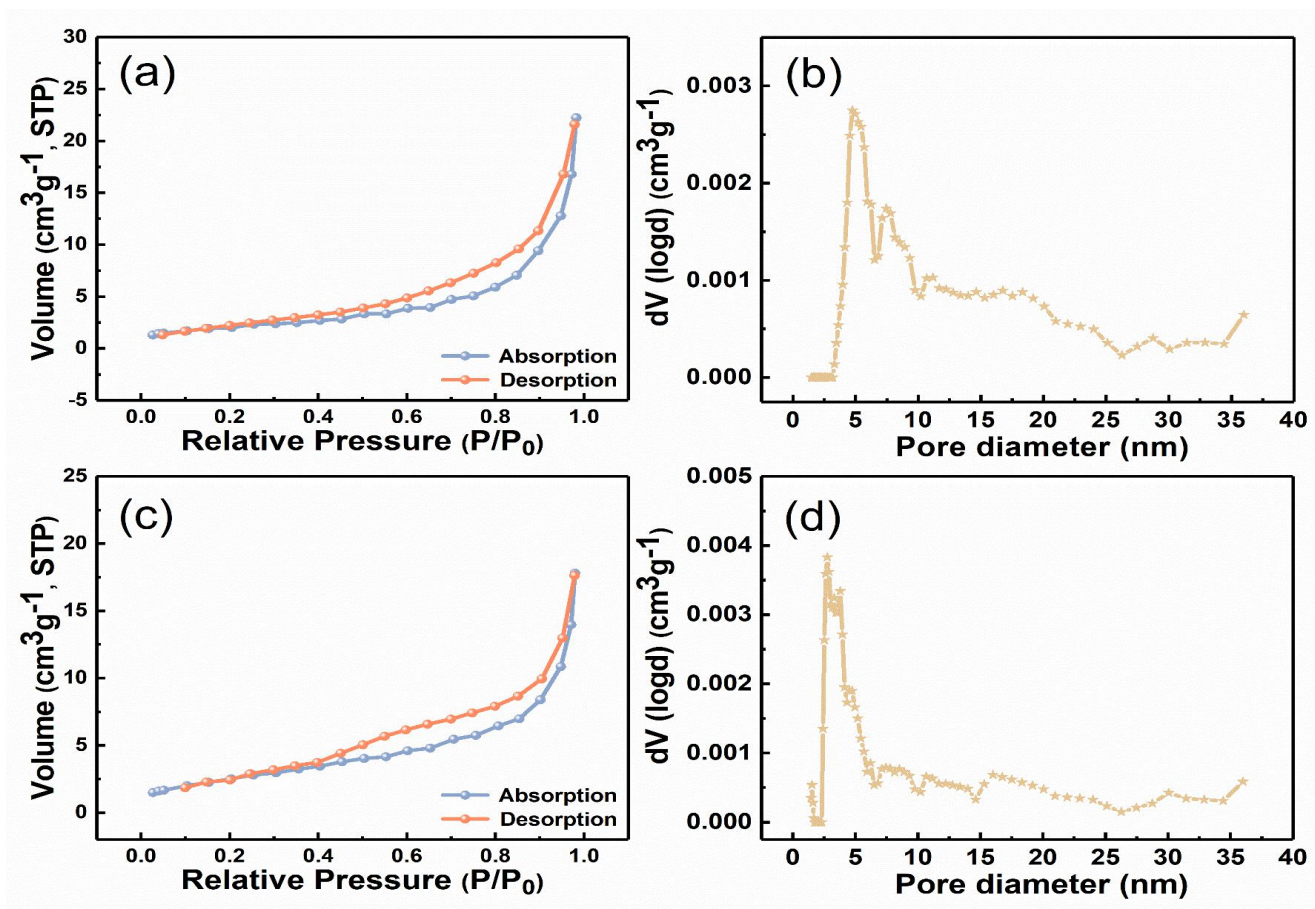

Fig. S1. (a) N<sub>2</sub> adsorption-desorption isotherm of LGN and (b) the corresponding pore size distribution of LGN; (c) N<sub>2</sub> adsorption-desorption isotherm of CGN and (d) the corresponding pore size distribution of CGN.

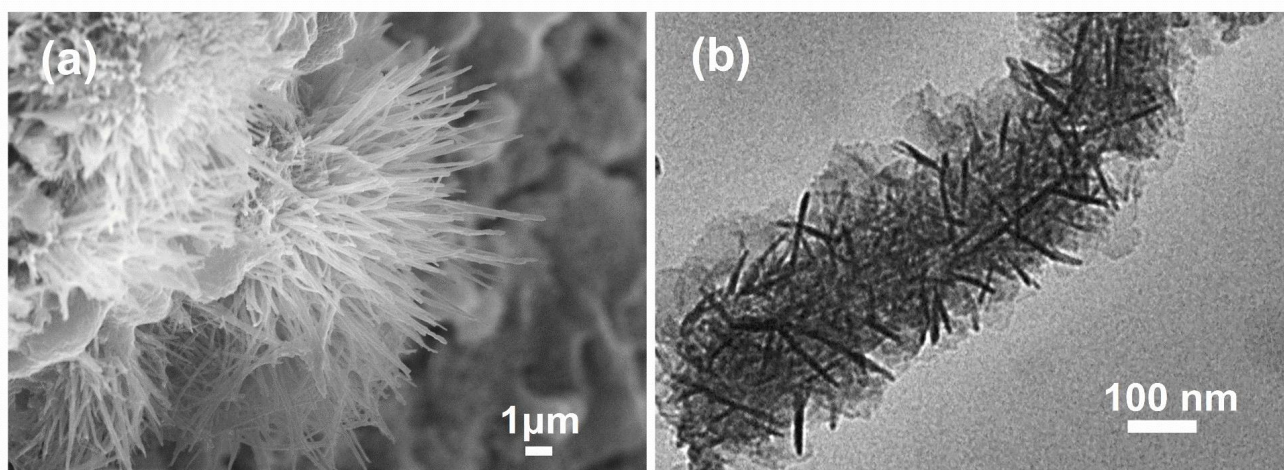

Fig. S2. (a) SEM image of CGN and (b) TEM image of CGN;



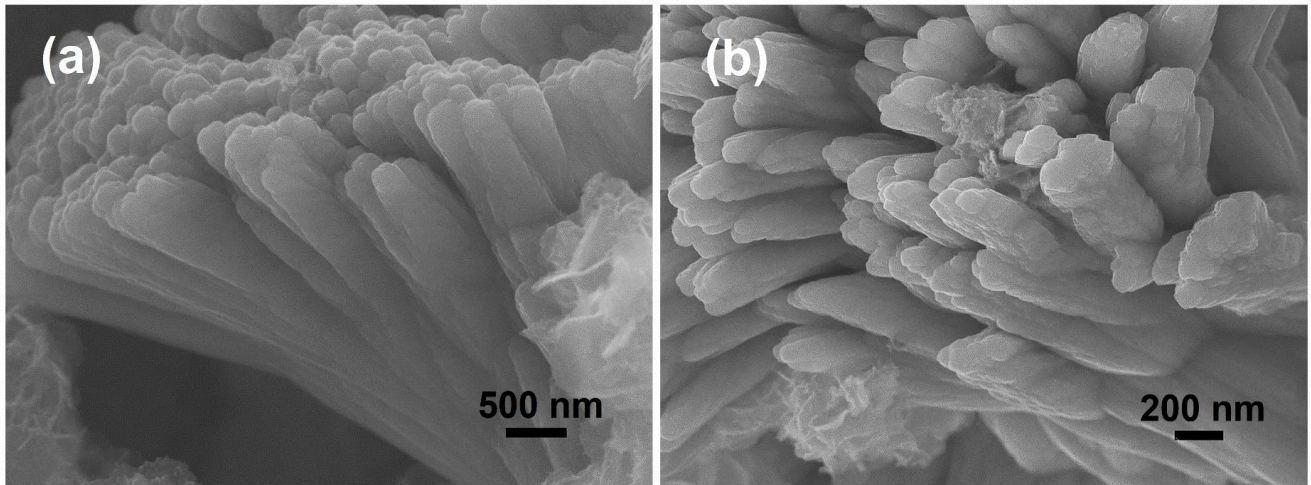

Fig. S3. (a) and (b) SEM images with different magnification of LGN.

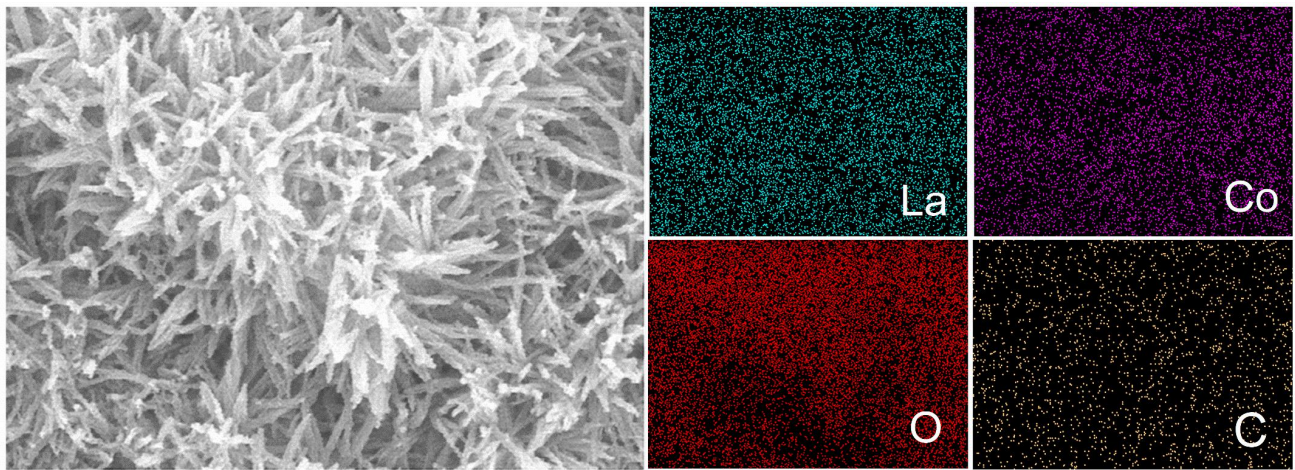

Fig. S4. EDS elemental mapping images of the composite (La, Co, O and C).

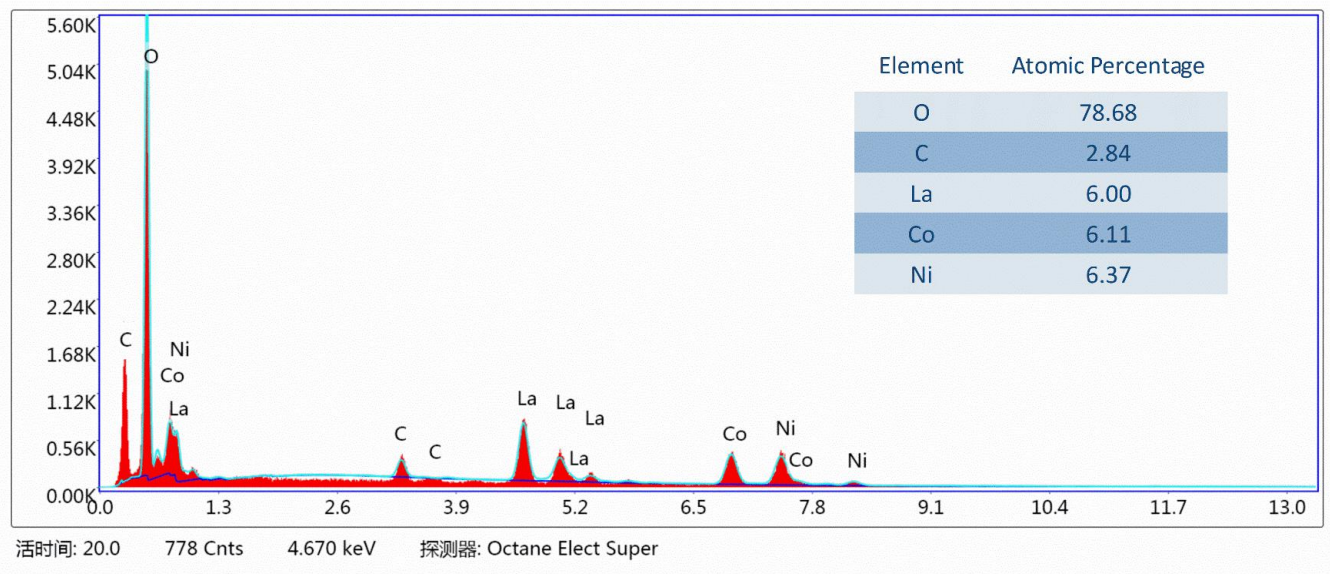

Fig. S5. EDS elemental mapping images of LCGN.

Table S1 Comparison of electrochemical performances of LCGN electrode in our work with previous.

| Materials                                                                      | Specific capacitance                                                                                          | capacitance retention (%)                 | Stability (%)           | Current density       | Refs.     |
|--------------------------------------------------------------------------------|---------------------------------------------------------------------------------------------------------------|-------------------------------------------|-------------------------|-----------------------|-----------|
| Co <sub>3</sub> O <sub>4</sub> composites                                      | 1455.64 F g <sup>-1</sup> at 1.0 A g <sup>-1</sup><br>in 6 mol L <sup>-1</sup> KOH                            | 88%<br>(0.5 to 20 A g <sup>-1</sup> )     | 82.52%<br>(2000 cycles) | 5 A g <sup>-1</sup>   | 1         |
| Co <sub>3</sub> O <sub>4</sub> / flocculent graphene composites                | 1584F g <sup>-1</sup> at 1.0 A g <sup>-1</sup><br>in 5 mol L <sup>-1</sup> KOH                                | 63.89%<br>(1 to 6.5 A g <sup>-1</sup> )   | 90%<br>(800 cycles)     | 10 A g <sup>-1</sup>  | 2         |
| ZnO / Co <sub>3</sub> O <sub>4</sub> composites                                | 1135 F g <sup>-1</sup> at 1.0 A g <sup>-1</sup><br>in 1 mol L <sup>-1</sup> KOH                               | 42%<br>(1 to 10 A g <sup>-1</sup> )       | 83%<br>(5000 cycles)    | 10 A g <sup>-1</sup>  | 3         |
| Co <sub>3</sub> O <sub>4</sub> / MnO <sub>2</sub> CC composites                | 616.7 F g <sup>-1</sup> at 2.0 A g <sup>-1</sup><br>in 1 mol L <sup>-1</sup> Na <sub>2</sub> SO <sub>4</sub>  | 77.6%<br>(2 to 20 A g <sup>-1</sup> )     | 86.3%<br>(10000cycles)  | 2 A g <sup>-1</sup>   | 4         |
| MnO <sub>2</sub> / La <sub>2</sub> O <sub>3</sub>                              | 1696 F g <sup>-1</sup> at 1.0 A g <sup>-1</sup><br>in 0.5 mol L <sup>-1</sup> Na <sub>2</sub> SO <sub>4</sub> | 58.6%<br>(1 to 15 A g <sup>-1</sup> )     | 88%<br>(2000 cycles)    | 5 A g <sup>-1</sup>   | 5         |
| La <sub>2</sub> O <sub>3</sub> / rGO composites                                | 156.25 F g <sup>-1</sup> at 0.1 A g <sup>-1</sup><br>in 3 mol L <sup>-1</sup> KOH                             | 66.67%<br>(0.1 to 0.5 A g <sup>-1</sup> ) | 78%<br>(500 cycles)     | 0.1 A g <sup>-1</sup> | 6         |
| La <sub>2</sub> O <sub>3</sub> / Co <sub>3</sub> O <sub>4</sub> / G composites | 2945.11 F g <sup>-1</sup> at 1 A g <sup>-1</sup><br>in 6 mol L <sup>-1</sup> KOH                              | 79.2%<br>(1 to 30 A g <sup>-1</sup> )     | 96%<br>(30000 cycles)   | 1 A g <sup>-1</sup>   | This work |

## References

1. A. Umar, S. D. Raut, A. A. Ibrahim, H. Algadi, H. Albargi, M. A. Alsaiari, M. S. Akhtar, M. Qamar and S. Baskoutas, *Electrochimica Acta*, 2021, **389**.
2. C. H. Wu, Q. Shen, R. Mi, S. X. Deng, and H. Yan, *Journal of Materials Chemistry A*, 2014, **2**, 15987-15994.
3. M. Gao, W. K. Wang, Q. Rong, J. Jiang, Y. J. Zhang and H. Q. Yu, *ACS Appl Mater Interfaces*, 2018, **10**, 23163-23173.
4. G. Liu, L. Ma and Q. Liu, *Electrochimica Acta*, 2020, **364**, 137265.
5. C. Sun, W. Pan, D. Zheng, R. Yao, and D. Jia, *Energy & Fuels*, 2020, **34**, 14882-14892.
6. J. Zhang, Z. Zhang, Y. Jiao, H. Yang, Y. Li, J. Zhang and P. Gao, *Journal of Power Sources*, 2019, **419**, 99-105.
